# Supplementary material for: Multi-stimuli-responsive programmable biomimetic actuator
Source: PubMed Central journal article supplement (PMC6733902; doi:10.1038/s41467-019-12044-5), 2019-09-09
Supplement: 41467_2019_12044_MOESM3_ESM.pdf [file 41467_2019_12044_MOESM3_ESM.pdf]

## **Description of Additional Supplementary Files**

File Name: Supplementary Movie 1

Description: Actuating performance of GO/PPy(a) under the stimulus of humidity; Actuating performance of GO/PPy(b) under the stimulus of humidity; Actuating performance of GO/PPy(c) under the stimulus of humidity

File Name: Supplementary Movie 2

Description: Actuating performance of GO/PPy(b) under the stimulus of IR light

File Name: Supplementary Movie 3

Description: The process of foam's picking and release by smart GO/PPy gripper with cross structure under the stimulus of humidity.

File Name: Supplementary Movie 4

Description: The process of flower's picking from vase by smart GO/PPy gripper with helical structure under the stimulus of humidity

File Name: Supplementary Movie 5

Description: The movement of a soft walking robot under the interval stimulus of IR light.
